# Supplementary material
Source: publisher figshare collection journal article supplement (https://karger.figshare.com/articles/dataset/_/5123227)
Supplement: Supplementary file 1 [file 1]

**Frequency and determinants of using pharmacological enhancement in the clinical practice of in-hospital stroke rehabilitation.**

**Supplemental figure 1: Standardized form for local study investigators to document the use or nonuse of agents potentially enhancing stroke recovery in consecutive individual patients.**

|             |                               |     |        |                                        | Use of agents potentially enhancing post-stroke recovery regardless of the indication |                             |                      |                            |                                           |                      |                      |                 |                 | Comorbidity              |                     |                       | PESR<br>1=yes 2=no | Symptoms for which PESR was |         |                    |
|-------------|-------------------------------|-----|--------|----------------------------------------|---------------------------------------------------------------------------------------|-----------------------------|----------------------|----------------------------|-------------------------------------------|----------------------|----------------------|-----------------|-----------------|--------------------------|---------------------|-----------------------|--------------------|-----------------------------|---------|--------------------|
| Center Name | Patient Identification Number | age | gender | Type of stroke: 1=ischemic 2=ICH 3=SAH | L-Dopa 1=yes 2=no                                                                     | Dopamine agonist 1=yes 2=no | Piracetam 1=yes 2=no | Methylphenidate 1=yes 2=no | Acetylcholinesterase inhibitor 1=yes 2=no | Memantine 1=yes 2=no | Modafinil 1=yes 2=no | SSRI 1=yes 2=no | SNRI 1=yes 2=no | Parkinson/RLS 1=yes 2=no | Dementia 1=yes 2=no | Depression 1=yes 2=no |                    | Aphasia                     | Paresis | Neglect/Extinction |
|             |                               |     |        |                                        |                                                                                       |                             |                      |                            |                                           |                      |                      |                 |                 |                          |                     |                       |                    |                             |         |                    |
|             |                               |     |        |                                        |                                                                                       |                             |                      |                            |                                           |                      |                      |                 |                 |                          |                     |                       |                    |                             |         |                    |
|             |                               |     |        |                                        |                                                                                       |                             |                      |                            |                                           |                      |                      |                 |                 |                          |                     |                       |                    |                             |         |                    |
|             |                               |     |        |                                        |                                                                                       |                             |                      |                            |                                           |                      |                      |                 |                 |                          |                     |                       |                    |                             |         |                    |

| s primarily used |        | Agents used for PESR |                             |                      |                            |                                           |                      |                      |                 |                 | comment |
|------------------|--------|----------------------|-----------------------------|----------------------|----------------------------|-------------------------------------------|----------------------|----------------------|-----------------|-----------------|---------|
| low impulse      | others | L-Dopa 1=yes 2=no    | Dopamine agonist 1=yes 2=no | Piracetam 1=yes 2=no | Methylphenidate 1=yes 2=no | Acetylcholinesterase inhibitor 1=yes 2=no | Memantine 1=yes 2=no | Modafinil 1=yes 2=no | SSRI 1=yes 2=no | SNRI 1=yes 2=no |         |
|                  |        |                      |                             |                      |                            |                                           |                      |                      |                 |                 |         |
|                  |        |                      |                             |                      |                            |                                           |                      |                      |                 |                 |         |
|                  |        |                      |                             |                      |                            |                                           |                      |                      |                 |                 |         |
|                  |        |                      |                             |                      |                            |                                           |                      |                      |                 |                 |         |

**Legend:** PESR means pharmacological enhancement in stroke rehabilitation, defined as use of agents potentially enhancing poststroke recovery **exclusively** with the idea of augmenting rehabilitation and in the absence of an established indication for their use. ICH refers to intracerebral hemorrhages, SAH refers to subarachnoid hemorrhages.
